# Supplementary material for: Decomposition of Fine Roots and Aboveground Agroforestry Litter as Plant-soil Feedback After Volcanic Ash Deposition
Source: Research Square preprint supplement (doi:10.21203/rs.3.rs-1150449/v1), 2021-12-16
Supplement: Supplementary file 1 [file 455762a3f1b7f122e3a846c3.docx]

**Table S1.** Analysis of variance of the remaining root dry weight after 8 weeks

| Source of variation | d.f. | s.s. | m.s. | v.r. | F pr. |
| --- | --- | --- | --- | --- | --- |
| Replicates*Units* stratum | 4 | 0.015333 | 0.003833 | 0.97 |  |
| Replicates*Units* stratum | | |  |  |  |
| Season | 1 | 0.467785 | 0.467785 | 117.8 | <.001 |
| Location | 1 | 0.054662 | 0.054662 | 13.77 | <.001 |
| Tree species | 5 | 0.36613 | 0.073226 | 18.44 | <.001 |
| Distance | 2 | 0.022713 | 0.011357 | 2.86 | 0.059 |

**Table S2.** Apparent effect of distance to the nearest coffee tree on k values relative to the average across all distances

| Distance [m] | 0.5 | 1 | 1.5 |
| --- | --- | --- | --- |
| ***Average*** | ***1.013*** | ***1.051*** | ***0.921*** |
| **Conditions** |  |  |  |
| +Ash, Wet | 1.042 | 1.098 | 0.774 |
| +Ash, Dry | 0.927 | 1.104 | 1.076 |
| -Ash, Wet | 1.042 | 0.995 | 0.946 |
| -Ash, Dry | 1.041 | 1.009 | 0.890 |
| **Species** |  |  |  |
| Gliricidia | 0.995 | 1.064 | 0.909 |
| Parasponia | 1.015 | 1.039 | 0.950 |
| Sengon | 0.945 | 1.182 | 0.883 |
| Durian | 1.074 | 0.906 | 0.991 |
| Coffee | 1.019 | 1.099 | 0.852 |
| Avocado | 1.030 | 1.016 | 0.945 |
